# Supplementary material
Source: MDPI journal article supplement (https://www.mdpi.com/2077-0472/13/5/1015)
Supplement: s1 [file s1]

**Table S1.** Names of food crops analyzed in this research , together with their cluster and codes used to join ESPAC and FAO databases.

| Cluster | Code               |       | Spanish name                   | English name                  | Scientific name         |
|---------|--------------------|-------|--------------------------------|-------------------------------|-------------------------|
|         | ESPAC              | FAO   |                                |                               |                         |
| 1       | 565                | 1661  | PEREJIL                        | PARSLEY                       | Petroselinum crispum    |
| 1       | 529                | 1997  | ESPINACA                       | SPINACH                       | Spinacia oleracea       |
| 1       | 563, 559           | 3877  | PAPA NABO, NABO                | TURNIP                        | Brassica rapa           |
| 1       | 525                | 784   | CILANTRO, CULANTRO             | CORIANDER                     | Coriandrum sativum      |
| 1       | 581                | 871   | ZANAHORIA                      | WILD CARROT                   | Daucus carota           |
|         |                    |       | AMARILLA                       |                               |                         |
| 2       | 433                | 1260  | GUABA                          | GUABA                         | Inga edulis             |
| 2       | 518                | 1265  | CAMOTE                         | SWEET POTATO                  | Ipomoea batatas         |
| 2       | 543                | 1313  | LECHUGA                        | LETTUCE                       | Lactuca sativa          |
| 2       | 576                | 1379  | TOMATE RIÑON                   | TOMATO                        | Lycopersicon esculentum |
| 2       | 445                | 1407  | MANZANA                        | APPLE                         | Malus domestica         |
| 2       | 444                | 1416  | MANGO                          | MANGO                         | Mangifera indica        |
| 2       | 579                | 1420  | YUCA, MANDIOCA                 | YUCCA                         | Manihot esculenta       |
| 2       | 465                | 14639 | PITAHAYA                       | RED PITAHAYA                  | Hylocereus undatus      |
| 2       | 428                | 16203 | CIRUELO                        | PLUM                          | Prunus domestica        |
| 2       | 446                | 1633  | MARACUYA                       | PASSION FRUIT                 | Passiflora edulis       |
| 2       | 402                | 1659  | AGUACATE                       | AVOCADO                       | Persea americana        |
| 2       | 578                | 1668  | VAINITA, EJOTE                 | GREEN BEANS                   | Phaseolus vulgaris      |
| 2       | 476                | 1686  | UVILLA                         | CAPE GOOSEBERRY (GOLDENBERRY) | Physalis peruviana      |
| 2       | 461, 462           | 1714  | PIMIENTA DULCE, PIMIENTA NEGRA | BLACK PEPPER                  | Piper nigrum            |
| 2       | 435                | 1804  | GUAYABA                        | GUAVA                         | Psidium guajava         |
| 2       | 460                | 1832  | PERA                           | PEAR                          | Pyrus communis          |
| 2       | 568                | 1839  | RABANO                         | RADISH                        | Raphanus sativus        |
| 2       | 419, 420, 427, 782 | 1887  | CAÑA DE AZÚCAR                 | SUGAR CANE                    | Saccharum sp.           |
| 2       | 451                | 1968  | NARANJILLA, LULO               | NARANJILLA (LULO)             | Solanum quitoense       |
| 2       | 561                | 1971  | PAPA                           | POTATO                        | Solanum tuberosum       |
| 2       | 557                | 2120  | MELLOCO                        | ULLUCU                        | Ullucus tuberosus       |
| 2       | 437                | 2177  | JENJIBRE                       | GINGER                        | Zingiber officinale     |
| 2       | 426                | 2194  | CHIRIMOYA                      | CUSTARD APPLE                 | Annona cherimola        |
| 2       | 457                | 2307  | PALMITO                        | PALMETTO                      | Bactris gasipaes        |
| 2       | 560                | 2371  | OCA                            | YAM                           | Oxalis tuberosa         |
| 2       | 432                | 2381  | GRANADILLA                     | PASSION FRUIT                 | Passiflora ligularis    |
| 2       | 407, 453, 454, 466 | 2483  | BANANO, ORITO, PLATANO         | BANANA                        | Musa sp.                |
| 2       | 459                | 2528  | PEPINO DULCE                   | MELON PEAR                    | Solanum                 |

|   |                                         |      |                                                          |                                                                      |                                        |
|---|-----------------------------------------|------|----------------------------------------------------------|----------------------------------------------------------------------|----------------------------------------|
| 2 | 582                                     | 3386 | ZANAHORIA BLANCA                                         | WHITE CARROT                                                         | muricatum<br>Arracacia<br>xanthorrhiza |
| 2 | 521,522                                 | 364  | CEBOLLA PERLA,<br>CEBOLLA COLORADA                       | PEARL ONION, RED ONION                                               | Allium cepa                            |
| 2 | 520                                     | 365  | CEBOLLA BLANCA                                           | WHITE ONION                                                          | Allium<br>fistulosum                   |
| 2 | 502                                     | 367  | AJO                                                      | GARLIC                                                               | Allium sativum                         |
| 2 | 516, 526, 527,<br>528, 570              | 3867 | BROCOLI, COL, COL DE<br>BRUCELAS, COLIFLOR,<br>ROMANESCO | BROCCOLI, CABBAGE,<br>BRUSSELS SPROUT,<br>CAULIFLOWER,<br>ROMANESQUE | Brassica oleracea                      |
| 2 | 464                                     | 402  | PIÑA                                                     | PINEAPPLE                                                            | Ananas comosus                         |
| 2 | 434                                     | 411  | GUANABANA                                                | SOURSOP                                                              | Annona muricata                        |
| 2 | 506                                     | 431  | APIO                                                     | CELERY                                                               | Apium<br>graveolens                    |
| 2 | 431                                     | 468  | ESPARRAGO                                                | ASPARAGUS                                                            | Asparagus<br>officinalis               |
| 2 | 580, 583                                | 5032 | ZAMBO, ZAPALLO,<br>CALABAZA                              | SQUASH, FIGLEAF GOURD                                                | Cucurbita<br>ficifolia                 |
| 2 | 569                                     | 514  | REMOLACHA                                                | BEETROOT                                                             | Beta vulgaris                          |
| 2 | 566                                     | 618  | PIMIENTO                                                 | PEPPER                                                               | Capsicum<br>annuum                     |
| 2 | 501                                     | 621  | AJI                                                      | CHILI PEPPER                                                         | Capsicum<br>frutescens                 |
| 2 | 458                                     | 630  | PAPAYA                                                   | PAPAYA                                                               | Carica papaya                          |
| 2 | 571                                     | 708  | SANDIA                                                   | WATERMELON                                                           | Citrullus lanatus                      |
| 2 | 440                                     | 714  | LIMON                                                    | LEMON                                                                | Citrus limon                           |
| 2 | 473                                     | 717  | TORONJA                                                  | PINK GRAPEFRUIT                                                      | Citrus paradisi                        |
| 2 | 443                                     | 718  | MANDARINA                                                | TANGERINE (MANDARIN)                                                 | Citrus reticulata                      |
| 2 | 450                                     | 720  | NARANJA                                                  | ORANGE                                                               | Citrus sinensis                        |
| 2 | 439                                     | 722  | LIMA                                                     | LIME                                                                 | Citrus sp.                             |
| 2 | 474                                     | 8094 | TUNA                                                     | TUNA                                                                 | Opuntia ficus-<br>indica               |
| 2 | 564                                     | 817  | PEPINILLO                                                | PICKLE                                                               | Cucumis sativus                        |
| 2 | 574                                     | 821  | SUQUINI, ZUCHINI                                         | ZUCCHINI                                                             | Cucurbita pepo                         |
| 2 | 472                                     | 859  | TOMATE DE ARBOL                                          | TAMARILLO                                                            | Cyphomandra<br>betacea                 |
| 2 | 418                                     | 8992 | CLAUDIA                                                  | CLAUDIA                                                              | Prunus salicina                        |
| 3 | 573, 788                                | 1150 | SOYA                                                     | SOY                                                                  | Glycine max                            |
| 3 | 519, 783                                | 1232 | CEBADA                                                   | BARLEY                                                               | Hordeum<br>vulgare                     |
| 3 | 507, 508                                | 1574 | ARROZ                                                    | RICE                                                                 | Oryza sativa                           |
| 3 | 523, 784                                | 1929 | CENTENO                                                  | RYE                                                                  | Secale cereale                         |
| 3 | 410,411,482,483                         | 2074 | CACAO CCN51, CACAO<br>FINO DE AROMA                      | COCOA CCN51, FINE-<br>AROMA COCOA                                    | Theobroma cacao                        |
| 3 | 577                                     | 2114 | TRIGO                                                    | WHEAT                                                                | Triticum<br>aestivum                   |
| 3 | 547, 548, 549,<br>550, 551, 552,<br>786 | 2175 | MAIZ DURO, MAIZ<br>SUAVE                                 | CORN                                                                 | Zea mays                               |
| 3 | 554                                     | 2199 | MANI                                                     | PEANUT                                                               | Arachis<br>hypogaea                    |
| 3 | 567                                     | 2509 | QUINUA                                                   | QUINOA                                                               | Chenopodium<br>quinoa                  |
| 3 | 513,781                                 | 481  | AVENA                                                    | OATMEAL                                                              | Avena sativa                           |
| 3 | 401                                     | 520  | ACHIOTE                                                  | ACHIOTE                                                              | Bixa orellana                          |
| 3 | 524                                     | 7435 | CHOCHO                                                   | ANDEAN LUPIN                                                         | Lupinus                                |

|   |                            |     |                                                                                              |                |                |
|---|----------------------------|-----|----------------------------------------------------------------------------------------------|----------------|----------------|
|   |                            |     |                                                                                              |                | mutabilis      |
| 3 | 412, 413, 414,<br>415, 416 | 749 | CAFÉ ARABIGO: CEREZA<br>FRESCA, CEREZA,<br>PERGAMINO OREADO,<br>PERGAMINO SECO,<br>GRANO ORO | ARABICA COFFEE | Coffea arabica |

---
